# Supplementary material for: GJB2 Is a Major Cause of Non-Syndromic Hearing Impairment in Senegal
Source: MDPI journal article supplement (doi:10.3390/biology11050795), 2022-05-23
Supplement: s1 [file s1]

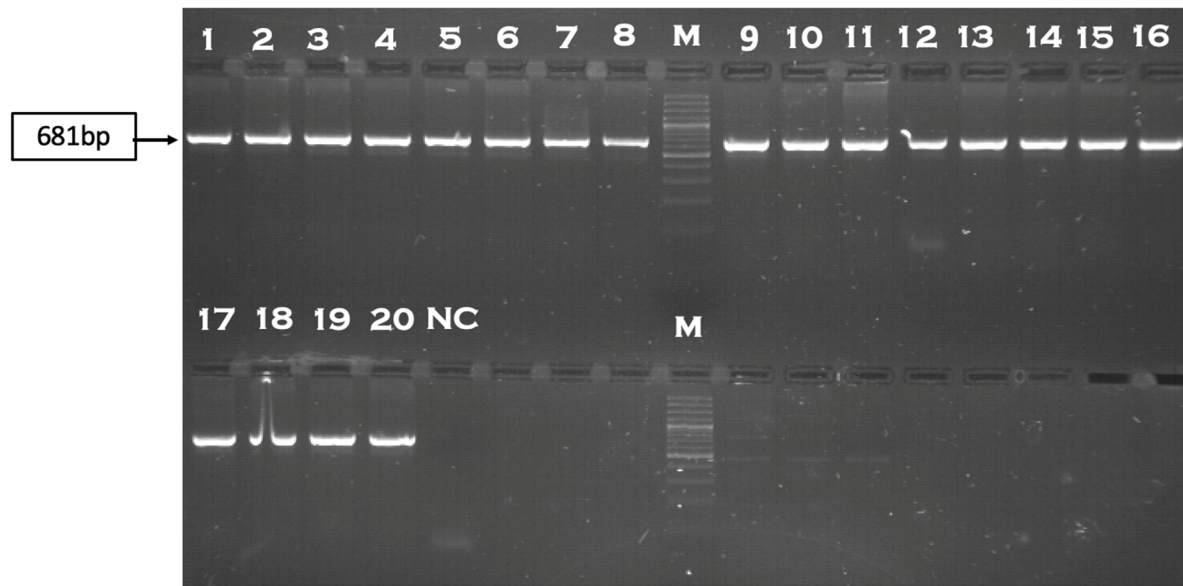

**Figure S1.** PCR-Multiplex products visualized on 2% agarose gel. We obtained a PCR product of 681 bp corresponding to the wild type (GJB6-1R→GJB6-2R). M and NC indicate the Molecular weight and Negative Control respectively.

**Table S1. Variant's interpretation according to the ACMG guidelines**

| ACMG criteria |                                                                                  |                       |
|---------------|----------------------------------------------------------------------------------|-----------------------|
| Variants      |                                                                                  | Clinical significance |
| c.94C>T       | PP3_Supporting, PM2_Strong, PM1_Strong, and PP5_Strong                           | Pathogenic            |
| c.427C>T      | PP5_Very strong, PM5_Moderate, PM2_Supporting, PP2_Supporting and PP3_supporting | Pathogenic            |
| 132G>A        | PVS1_Very strong, PM2_Strong, PP5_Strong and PP3_Supporting)                     | Pathogenic            |
